# Supplementary material
Source: PubMed Central journal article supplement (PMC4592864)
Supplement: AEM.02280-15_zam999116694so1.pdf [file AEM.02280-15_zam999116694so1.pdf]

# Quantitative Stable Isotope Probing

Bruce A. Hungate, Rebecca L. Mau, Egbert Schwartz, J. Gregory Caporaso, Paul Dijkstra,  
Natasja van Gestel, Benjamin J. Koch, Cindy M. Liu, Theresa A. McHugh, Jane C. Marks,  
Ember Morrissey, Lance B. Price

## **Supplemental Information**

This file contains the code used in QIIME to analyze the sequencing data, including all steps used in that analysis. This file also contains a table (Table S1), which summarizes results from the bioinformatics statistics.

### ***QIIME Code and Analysis Steps***

#### *Sequence preparation*

Paired end reads were stitched as described in supplementary methods. These files were edited to contain valid post-split-libraries sequence identifiers (a QIIME requirement).

Get valid post-split-libraries sequence identifiers:

```
In [1]: from bipy.parse.fasta import MinimalFastaParser
```

```
In [2]: infp = "RAV241_246_tgen_newStitched.fa"
```

```
In [3]: ofp = infp + '.fna'
```

```
23
24 In [4]: of = open(ofp, 'w')
25
26 In [5]: for seq_id, seq in MinimalFastaParser(open(infp)):
27     ....:     seq_id = seq_id.split(':')[0]
28     ....:     of.write('>%s\n%s\n' % (seq_id, seq))
29     ....:
30
31 In [6]: of.close()
32
33 In [9]: infps = ["RAV247_252_tgen_newStitched.fa",
34 "RAV253_257_tgen_newStitched.fa"]
35
36 In [10]: for infp in infps:
37     ....:     ofp = infp + '.fna'
38     ....:     of = open(ofp, 'w')
39     ....:     for seq_id, seq in MinimalFastaParser(open(infp)):
40     ....:         seq_id = seq_id.split(':')[0]
41     ....:         of.write('>%s\n%s\n' % (seq_id, seq))
42     ....:     of.close()
43     ....:
44
45 # Sanity check
46 In [13]: !count_seqs.py -i "RAV*"
```

47

48 1053070 : RAV253\_257\_tgen\_newStitched.fa (Sequence lengths  
49 (mean +/- std): 415.9885 +/- 12.3755)

50 1053070 : RAV253\_257\_tgen\_newStitched.fa.fna (Sequence lengths  
51 (mean +/- std): 415.9885 +/- 12.3755)

52

53 3125131 : RAV247\_252\_tgen\_newStitched.fa (Sequence lengths  
54 (mean +/- std): 413.0582 +/- 17.0290)

55 3125131 : RAV247\_252\_tgen\_newStitched.fa.fna (Sequence lengths  
56 (mean +/- std): 413.0582 +/- 17.0290)

57

58 5200677 : RAV241\_246\_tgen\_newStitched.fa (Sequence lengths  
59 (mean +/- std): 412.6679 +/- 15.8659)

60 5200677 : RAV241\_246\_tgen\_newStitched.fa.fna (Sequence lengths  
61 (mean +/- std): 412.6679 +/- 15.8659)

62

63 Iterative [open-reference OTU picking](#)

64 echo "pick\_open\_reference\_otus.py -i  
65 /home/caporaso/analysis/2014.02.17-  
66 hungate/Tgen\_Stitch/RAV241\_246\_tgen\_newStitched.fa.fna,/home/cap  
67 oraso/analysis/2014.02.17-  
68 hungate/Tgen\_Stitch/RAV247\_252\_tgen\_newStitched.fa.fna,/home/cap  
69 oraso/analysis/2014.02.17-

```
70 hungate/Tgen_Stitch/RAV253_257_tgen_newStitched.fa.fna -r
71 /data/gg_13_8_otus/rep_set/97_otus.fasta -o
72 /home/caporaso/analysis/2014.02.17-hungate/Tgen_Stitch/ucrssi/ -p
73 /home/caporaso/analysis/uc_fast_params.txt -a05" | qsub -keo -N
74 hungate-otus
```

75

```
76 echo "pick_open_reference_otus.py -i
77 /home/caporaso/analysis/2014.02.17-
78 hungate/Tgen_Stitch/RAV241_246_tgen_newStitched.fa.fna,/home/cap
79 oraso/analysis/2014.02.17-
80 hungate/Tgen_Stitch/RAV247_252_tgen_newStitched.fa.fna,/home/cap
81 oraso/analysis/2014.02.17-
```

```
82 hungate/Tgen_Stitch/RAV253_257_tgen_newStitched.fa.fna -r
83 /data/gg_13_8_otus/rep_set/97_otus.fasta -o
84 /home/caporaso/analysis/2014.02.17-hungate/Tgen_Stitch/ucrssi/ -p
85 /home/caporaso/analysis/uc_fast_params.txt -a05 -f" | qsub -keo
86 -N hungate-otus
```

87

## 88 **Diversity analyses**

```
89 echo "core_diversity_analyses.py -i
90 /home/caporaso/analysis/2014.02.17-
91 hungate/Tgen_Stitch/ucrssi/otu_table_mc2_w_tax_no_pynast_failures
92 .biom -o /home/caporaso/analysis/2014.02.17-
```

```
93  hungate/Tgen_Stitch/ucrсс/cd_4049/ -e 4049 -m
94  /home/caporaso/analysis/2014.02.17-hungate/Tgen_Stitch/hungate-
95  dob-map.tsv -t /home/caporaso/analysis/2014.02.17-
96  hungate/Tgen_Stitch/ucrсс/rep_set.tre -a0 5 -c sample-
97  num,fraction-num,week-num,control-or-priming,combo-trt-
98  code,isotope-trt" | qsub -keo -N cd4049
99  # killed the above bc the sample-num boxplots were taking way
100 too long (~30 hours and weighted unifrac still wasn't done) - we
101 can add sample-num,fraction-num back later if we need to.
102
103 echo "core_diversity_analyses.py -i
104 /home/caporaso/analysis/2014.02.17-
105 hungate/Tgen_Stitch/ucrсс/otu_table_mc2_w_tax_no_pynast_failures
106 .biom -o /home/caporaso/analysis/2014.02.17-
107 hungate/Tgen_Stitch/ucrсс/cd_4049/ -e 4049 -m
108 /home/caporaso/analysis/2014.02.17-hungate/Tgen_Stitch/hungate-
109 dob-map.tsv -t /home/caporaso/analysis/2014.02.17-
110 hungate/Tgen_Stitch/ucrсс/rep_set.tre -a0 5 -c week-num,control-
111 or-priming --recover_from_failure" | qsub -keo -N cd4049
112
113 # re-run with isotope-trt,combo-trt-code added as categories
114 echo "core_diversity_analyses.py -i
115 /home/caporaso/analysis/2014.02.17-
116 hungate/Tgen_Stitch/ucrсс/otu_table_mc2_w_tax_no_pynast_failures
```

```
117 .biom -o /home/caporaso/analysis/2014.02.17-
118 hungate/Tgen_Stitch/ucrсс/cd_4049/ -e 4049 -m
119 /home/caporaso/analysis/2014.02.17-hungate/Tgen_Stitch/hungate-
120 dob-map.tsv -t /home/caporaso/analysis/2014.02.17-
121 hungate/Tgen_Stitch/ucrсс/rep_set.tre -a0 5 -c isotope-
122 trt,combo-trt-code --recover_from_failure" | qsub -keo -N cd4049
123
124 # re-run with comb-week-control added as a category
125 echo "core_diversity_analyses.py -i
126 /home/caporaso/analysis/2014.02.17-
127 hungate/Tgen_Stitch/ucrсс/otu_table_mc2_w_tax_no_pynast_failures
128 .biom -o /home/caporaso/analysis/2014.02.17-
129 hungate/Tgen_Stitch/ucrсс/cd_4049/ -e 4049 -m
130 /home/caporaso/analysis/2014.02.17-hungate/Tgen_Stitch/hungate-
131 dob-map.tsv -t /home/caporaso/analysis/2014.02.17-
132 hungate/Tgen_Stitch/ucrсс/rep_set.tre -a0 5 -c week-num,control-
133 or-priming,comb-week-control,isotope-trt,combo-trt-code --
134 recover_from_failure" | qsub -keo -N cd4049
135
136 # run locally to generate rarefaction plots with continuous
137 coloring
138 ## NEED TO RE-RUN FOR LAST ITERATION OF CORE DIV!
139 cd cd_4049/arare_max4049/
140 mv alpha_rarefaction_plots/ alpha_rarefaction_plots_discrete
```

```
141 make_prefs_file.py -m ../hungate-dob-map.tsv -o prefs.txt
142 make_rarefaction_plots.py -i alpha_div_collated/ -m ../hungate-
143 dob-map.tsv -o alpha_rarefaction_plots/ -p prefs.txt
144
145 Comparison of uclust consensus taxonomic assignment with RDP taxonomic
146 assignment
147 parallel_assign_taxonomy_rdp.py -i
148 /home/caporaso/analysis/2014.02.17-
149 hungate/Tgen_Stitch/ucrss/rep_set.fna -o
150 /home/caporaso/analysis/2014.02.17-
151 hungate/Tgen_Stitch/ucrss/rdp_assigned_taxonomy/ -c 0.50 -O 25
152
153 biom add-metadata -i /home/caporaso/analysis/2014.02.17-
154 hungate/Tgen_Stitch/ucrss//otu_table_mc2.biom --observation-
155 metadata-fp /home/caporaso/analysis/2014.02.17-
156 hungate/Tgen_Stitch/ucrss/rdp_assigned_taxonomy/rep_set_tax_assi
157 gnments.txt -o /home/caporaso/analysis/2014.02.17-
158 hungate/Tgen_Stitch/ucrss//otu_table_mc2_w_rdptax.biom --sc-
159 separated taxonomy --observation-header OTUID,taxonomy
160
161 filter_otus_from_otu_table.py -i
162 /home/caporaso/analysis/2014.02.17-
163 hungate/Tgen_Stitch/ucrss//otu_table_mc2_w_rdptax.biom -o
```

```
164 /home/caporaso/analysis/2014.02.17-
165 hungate/Tgen_Stitch/ucrssl/otu_table_mc2_w_rdptax_no_pynast_fail
166 ures.biom -e /home/caporaso/analysis/2014.02.17-
167 hungate/Tgen_Stitch/ucrssl/pynast_aligned_seqs/rep_set_failures.f
168 asta
169
170 biom summarize-table -i /home/caporaso/analysis/2014.02.17-
171 hungate/Tgen_Stitch/ucrssl/otu_table_mc2_w_rdptax_no_pynast_fail
172 ures.biom -o /home/caporaso/analysis/2014.02.17-
173 hungate/Tgen_Stitch/ucrssl/otu_table_mc2_w_rdptax_no_pynast_fail
174 ures.txt
175
176 summarize_taxa_through_plots.py -i
177 /home/caporaso/analysis/2014.02.17-
178 hungate/Tgen_Stitch/ucrssl/otu_table_mc2_w_rdptax_no_pynast_failu
179 res.biom -o /home/caporaso/analysis/2014.02.17-
180 hungate/Tgen_Stitch/ucrssl/rdp_taxa_plots/
181
182 compare_taxa_summaries.py -i /home/caporaso/analysis/2014.02.17-
183 hungate/Tgen_Stitch/ucrssl/rdp_taxa_plots/otu_table_mc2_w_rdptax_
184 no_pynast_failures_L2.txt,/home/caporaso/analysis/2014.02.17-
185 hungate/Tgen_Stitch/ucrssl/cd_4049/taxa_plots/table_mc4049_sorted
186 _L2.txt -o rdp_v_uclust_tax_L2 -m paired
```



```
187 compare_taxa_summaries.py -i /home/caporaso/analysis/2014.02.17-
188 hungate/Tgen_Stitch/ucrss/rdp_taxa_plots/otu_table_mc2_w_rdptax_
189 no_pynast_failures_L3.txt,/home/caporaso/analysis/2014.02.17-
190 hungate/Tgen_Stitch/ucrss/cd_4049/taxa_plots/table_mc4049_sorted
191 _L3.txt -o rdp_v_uclust_tax_L3 -m paired
192 compare_taxa_summaries.py -i /home/caporaso/analysis/2014.02.17-
193 hungate/Tgen_Stitch/ucrss/rdp_taxa_plots/otu_table_mc2_w_rdptax_
194 no_pynast_failures_L4.txt,/home/caporaso/analysis/2014.02.17-
195 hungate/Tgen_Stitch/ucrss/cd_4049/taxa_plots/table_mc4049_sorted
196 _L4.txt -o rdp_v_uclust_tax_L4 -m paired
197 compare_taxa_summaries.py -i /home/caporaso/analysis/2014.02.17-
198 hungate/Tgen_Stitch/ucrss/rdp_taxa_plots/otu_table_mc2_w_rdptax_
199 no_pynast_failures_L5.txt,/home/caporaso/analysis/2014.02.17-
200 hungate/Tgen_Stitch/ucrss/cd_4049/taxa_plots/table_mc4049_sorted
201 _L5.txt -o rdp_v_uclust_tax_L5 -m paired
202 compare_taxa_summaries.py -i /home/caporaso/analysis/2014.02.17-
203 hungate/Tgen_Stitch/ucrss/rdp_taxa_plots/otu_table_mc2_w_rdptax_
204 no_pynast_failures_L6.txt,/home/caporaso/analysis/2014.02.17-
205 hungate/Tgen_Stitch/ucrss/cd_4049/taxa_plots/table_mc4049_sorted
206 _L6.txt -o rdp_v_uclust_tax_L6 -m pair
```

Table S1. Statistical analysis of QIIME output, showing confidence levels in taxonomic assignments.

| Taxonomic level | Pearson r | 95% Confidence Interval (lower bound) | 95% Confidence Interval (upper bound) | Nonparametric p-value |
|-----------------|-----------|---------------------------------------|---------------------------------------|-----------------------|
| Phylum          | 0.9996    | 0.9996                                | 0.9996                                | < 0.001               |
| Class           | 0.9993    | 0.9992                                | 0.9993                                | < 0.001               |
| Order           | 0.9990    | 0.9990                                | 0.9990                                | < 0.001               |
| Family          | 0.9822    | 0.9821                                | 0.9824                                | < 0.001               |
| Genus           | 0.9616    | 0.9613                                | 0.9618                                | < 0.001               |

Table S2. qPCR analysis of the 16S gene for each density fraction

| #SampleID | Tube | glucose | water    | density-g-<br>p-mL | 16S-qPCR-<br>copynum-<br>p-uL |
|-----------|------|---------|----------|--------------------|-------------------------------|
| 1.2       | 1    | none    | nat abun | 1.69581            | 195379.5                      |
| 1.21      | 1    | none    | nat abun | 1.69249            | 282486.0                      |
| 1.22      | 1    | none    | nat abun | 1.69139            | 310844.9                      |
| 1.23      | 1    | none    | nat abun | 1.69139            | 250752.9                      |
| 1.24      | 1    | none    | nat abun | 1.68586            | 208810.1                      |
| 1.25      | 1    | none    | nat abun | 1.68586            | 143032.8                      |
| 1.26      | 1    | none    | nat abun | 1.68255            | 70350.8                       |
| 1.27      | 1    | none    | nat abun | 1.68034            | 25598.2                       |
| 1.28      | 1    | none    | nat abun | 1.67703            | 16908.1                       |
| 1.29      | 1    | none    | nat abun | 1.67703            | 10827.1                       |
| 1.3       | 1    | none    | nat abun | 1.67482            | 6074.6                        |
| 2.12      | 2    | none    | nat abun | 1.71437            | 702.0                         |
| 2.13      | 2    | none    | nat abun | 1.71003            | 5511.1                        |
| 2.14      | 2    | none    | nat abun | 1.70895            | 5792.9                        |
| 2.15      | 2    | none    | nat abun | 1.70569            | 19987.9                       |
| 2.16      | 2    | none    | nat abun | 1.70243            | 102398.0                      |
| 2.17      | 2    | none    | nat abun | 1.69917            | 255659.7                      |
| 2.18      | 2    | none    | nat abun | 1.69483            | 182935.5                      |
| 2.19      | 2    | none    | nat abun | 1.69049            | 176871.6                      |
| 2.2       | 2    | none    | nat abun | 1.68397            | 102896.8                      |
| 3.09      | 3    | none    | nat abun | 1.72026            | 1130.2                        |
| 3.11      | 3    | none    | nat abun | 1.71262            | 1394.5                        |
| 3.12      | 3    | none    | nat abun | 1.70934            | 2519.9                        |
| 3.13      | 3    | none    | nat abun | 1.70715            | 6733.9                        |
| 3.16      | 3    | none    | nat abun | 1.69514            | 129206.6                      |
| 3.17      | 3    | none    | nat abun | 1.69186            | 199474.9                      |
| 3.18      | 3    | none    | nat abun | 1.68858            | 262653.9                      |
| 3.19      | 3    | none    | nat abun | 1.69077            | 117614.2                      |
| 3.2       | 3    | none    | nat abun | 1.68422            | 85964.5                       |
| 3.21      | 3    | none    | nat abun | 1.68312            | 35034.3                       |
| 3.22      | 3    | none    | nat abun | 1.67875            | 11926.9                       |
| 3.23      | 3    | none    | nat abun | 1.67875            | 6396.0                        |
| 4.09      | 4    | none    | 97% 18O  | 1.73826            | 290.3                         |
| 4.11      | 4    | none    | 97% 18O  | 1.73392            | 1023.7                        |
| 4.12      | 4    | none    | 97% 18O  | 1.73283            | 1218.4                        |
| 4.13      | 4    | none    | 97% 18O  | 1.72849            | 887.2                         |
| 4.17      | 4    | none    | 97% 18O  | 1.71872            | 8307.4                        |
| 4.18      | 4    | none    | 97% 18O  | 1.71329            | 13351.7                       |

|      |   |           |           |         |          |
|------|---|-----------|-----------|---------|----------|
| 4.19 | 4 | none      | 97% 180   | 1.71329 | 25963.7  |
| 4.2  | 4 | none      | 97% 180   | 1.71329 | 57820.1  |
| 4.21 | 4 | none      | 97% 180   | 1.70786 | 28942.1  |
| 4.22 | 4 | none      | 97% 180   | 1.70243 | 64547.1  |
| 4.23 | 4 | none      | 97% 180   | 1.70026 | 140311.0 |
| 4.24 | 4 | none      | 97% 180   | 1.69809 | 80501.2  |
| 4.25 | 4 | none      | 97% 180   | 1.69374 | 107908.5 |
| 4.26 | 4 | none      | 97% 180   | 1.68940 | 65896.6  |
| 5.09 | 5 | none      | 97% 180   | 1.71707 | 19109.6  |
| 5.1  | 5 | none      | 97% 180   | 1.71271 | 29223.8  |
| 5.11 | 5 | none      | 97% 180   | 1.71052 | 66513.6  |
| 5.12 | 5 | none      | 97% 180   | 1.71052 | 33385.8  |
| 5.13 | 5 | none      | 97% 180   | 1.70398 | 103146.4 |
| 5.15 | 5 | none      | 97% 180   | 1.69852 | 298566.4 |
| 5.16 | 5 | none      | 97% 180   | 1.69415 | 387737.3 |
| 5.17 | 5 | none      | 97% 180   | 1.69197 | 142507.7 |
| 5.18 | 5 | none      | 97% 180   | 1.68651 | 127473.3 |
| 5.19 | 5 | none      | 97% 180   | 1.68324 | 35066.6  |
| 5.2  | 5 | none      | 97% 180   | 1.68215 | 243.1    |
| 5.22 | 5 | none      | 97% 180   | 1.67778 | 11177.9  |
| 5.23 | 5 | none      | 97% 180   | 1.67669 | 5510.4   |
| 5.24 | 5 | none      | 97% 180   | 1.67342 | 3741.1   |
| 6.08 | 6 | none      | 97% 180   | 1.72013 | 6266.3   |
| 6.09 | 6 | none      | 97% 180   | 1.71683 | 7994.9   |
| 6.1  | 6 | none      | 97% 180   | 1.71244 | 13189.6  |
| 6.11 | 6 | none      | 97% 180   | 1.70804 | 25158.1  |
| 6.12 | 6 | none      | 97% 180   | 1.70475 | 40810.3  |
| 6.13 | 6 | none      | 97% 180   | 1.70475 | 54854.2  |
| 6.14 | 6 | none      | 97% 180   | 1.69706 | 68266.3  |
| 6.15 | 6 | none      | 97% 180   | 1.69376 | 72412.2  |
| 6.16 | 6 | none      | 97% 180   | 1.69157 | 106788.2 |
| 6.17 | 6 | none      | 97% 180   | 1.68827 | 146010.1 |
| 6.18 | 6 | none      | 97% 180   | 1.68388 | 140868.6 |
| 6.19 | 6 | none      | 97% 180   | 1.67949 | 79977.4  |
| 6.2  | 6 | none      | 97% 180   | 1.67839 | 42703.1  |
| 6.21 | 6 | none      | 97% 180   | 1.67399 | 26187.2  |
| 6.22 | 6 | none      | 97% 180   | 1.66850 | 13974.0  |
| 7.09 | 7 | nat abund | nat abund | 1.72342 | 1190.0   |
| 7.1  | 7 | nat abund | nat abund | 1.71793 | 782.5    |
| 7.11 | 7 | nat abund | nat abund | 1.71463 | 1902.5   |
| 7.12 | 7 | nat abund | nat abund | 1.71134 | 1983.5   |
| 7.13 | 7 | nat abund | nat abund | 1.70695 | 4275.2   |
| 7.14 | 7 | nat abund | nat abund | 1.70695 | 8413.3   |

|       |    |          |          |         |          |
|-------|----|----------|----------|---------|----------|
| 7.16  | 7  | nat abun | nat abun | 1.69596 | 59229.8  |
| 7.17  | 7  | nat abun | nat abun | 1.69267 | 148575.9 |
| 7.18  | 7  | nat abun | nat abun | 1.68827 | 297527.8 |
| 7.19  | 7  | nat abun | nat abun | 1.68498 | 268087.0 |
| 7.2   | 7  | nat abun | nat abun | 1.68168 | 208338.7 |
| 7.21  | 7  | nat abun | nat abun | 1.67839 | 12.7     |
| 7.22  | 7  | nat abun | nat abun | 1.67290 | 65751.2  |
| 8.11  | 8  | nat abun | nat abun | 1.71263 | 158.8    |
| 8.14  | 8  | nat abun | nat abun | 1.70173 | 40839.2  |
| 8.15  | 8  | nat abun | nat abun | 1.69737 | 99724.5  |
| 8.16  | 8  | nat abun | nat abun | 1.69737 | 255649.3 |
| 8.17  | 8  | nat abun | nat abun | 1.69192 | 438744.1 |
| 8.18  | 8  | nat abun | nat abun | 1.68865 | 208369.4 |
| 8.19  | 8  | nat abun | nat abun | 1.68539 | 180135.9 |
| 8.2   | 8  | nat abun | nat abun | 1.68430 | 92049.3  |
| 8.21  | 8  | nat abun | nat abun | 1.68103 | 55443.6  |
| 8.23  | 8  | nat abun | nat abun | 1.67776 | 7937.9   |
| 8.24  | 8  | nat abun | nat abun | 1.67885 | 2304.6   |
| 9.12  | 9  | nat abun | nat abun | 1.71825 | 1053.6   |
| 9.14  | 9  | nat abun | nat abun | 1.71500 | 2202.3   |
| 9.15  | 9  | nat abun | nat abun | 1.71175 | 2934.1   |
| 9.16  | 9  | nat abun | nat abun | 1.70849 | 10164.9  |
| 9.18  | 9  | nat abun | nat abun | 1.70199 | 71409.6  |
| 9.19  | 9  | nat abun | nat abun | 1.69765 | 158480.9 |
| 9.2   | 9  | nat abun | nat abun | 1.69440 | 206591.6 |
| 9.21  | 9  | nat abun | nat abun | 1.69006 | 231657.2 |
| 9.22  | 9  | nat abun | nat abun | 1.68247 | 107583.0 |
| 10.1  | 10 | nat abun | 97% 18O  | 1.71934 | 8574.1   |
| 10.11 | 10 | nat abun | 97% 18O  | 1.71717 | 32940.5  |
| 10.12 | 10 | nat abun | 97% 18O  | 1.71283 | 8644.2   |
| 10.13 | 10 | nat abun | 97% 18O  | 1.71175 | 48513.4  |
| 10.14 | 10 | nat abun | 97% 18O  | 1.70741 | 66720.1  |
| 10.15 | 10 | nat abun | 97% 18O  | 1.70524 | 78419.9  |
| 10.16 | 10 | nat abun | 97% 18O  | 1.70091 | 181429.5 |
| 10.17 | 10 | nat abun | 97% 18O  | 1.69765 | 236561.7 |
| 10.18 | 10 | nat abun | 97% 18O  | 1.69440 | 116247.8 |
| 10.19 | 10 | nat abun | 97% 18O  | 1.69115 | 110746.8 |
| 10.2  | 10 | nat abun | 97% 18O  | 1.68898 | 30122.2  |
| 10.21 | 10 | nat abun | 97% 18O  | 1.68681 | 57095.4  |
| 10.22 | 10 | nat abun | 97% 18O  | 1.68356 | 24712.8  |
| 11.12 | 11 | nat abun | 97% 18O  | 1.70834 | 122343.3 |
| 11.13 | 11 | nat abun | 97% 18O  | 1.71052 | 372085.0 |
| 11.14 | 11 | nat abun | 97% 18O  | 1.71162 | 113722.0 |

|       |    |          |          |         |          |
|-------|----|----------|----------|---------|----------|
| 11.15 | 11 | nat abun | 97% 18O  | 1.69961 | 250492.1 |
| 11.16 | 11 | nat abun | 97% 18O  | 1.70070 | 322448.0 |
| 11.17 | 11 | nat abun | 97% 18O  | 1.69634 | 233383.9 |
| 11.18 | 11 | nat abun | 97% 18O  | 1.69197 | 208305.1 |
| 11.19 | 11 | nat abun | 97% 18O  | 1.68870 | 139133.9 |
| 11.2  | 11 | nat abun | 97% 18O  | 1.68761 | 66842.3  |
| 11.21 | 11 | nat abun | 97% 18O  | 1.68979 | 50910.1  |
| 11.22 | 11 | nat abun | 97% 18O  | 1.68542 | 15927.7  |
| 11.23 | 11 | nat abun | 97% 18O  | 1.67887 | 25189.2  |
| 12.1  | 12 | nat abun | 97% 18O  | 1.72344 | 4379.1   |
| 12.11 | 12 | nat abun | 97% 18O  | 1.72015 | 8095.0   |
| 12.12 | 12 | nat abun | 97% 18O  | 1.71796 | 18464.9  |
| 12.13 | 12 | nat abun | 97% 18O  | 1.71467 | 36486.5  |
| 12.14 | 12 | nat abun | 97% 18O  | 1.71028 | 59608.8  |
| 12.15 | 12 | nat abun | 97% 18O  | 1.70590 | 84484.4  |
| 12.16 | 12 | nat abun | 97% 18O  | 1.70590 | 120118.3 |
| 12.17 | 12 | nat abun | 97% 18O  | 1.70261 | 118149.3 |
| 12.18 | 12 | nat abun | 97% 18O  | 1.69712 | 118360.1 |
| 12.19 | 12 | nat abun | 97% 18O  | 1.69603 | 158605.8 |
| 12.2  | 12 | nat abun | 97% 18O  | 1.68835 | 141594.1 |
| 12.21 | 12 | nat abun | 97% 18O  | 1.68616 | 40408.2  |
| 12.22 | 12 | nat abun | 97% 18O  | 1.67958 | 43900.3  |
| 13.1  | 13 | 99% 13C  | nat abun | 1.72706 | 7834.4   |
| 13.11 | 13 | 99% 13C  | nat abun | 1.72377 | 11034.9  |
| 13.12 | 13 | 99% 13C  | nat abun | 1.72268 | 9234.6   |
| 13.14 | 13 | 99% 13C  | nat abun | 1.71282 | 15236.5  |
| 13.15 | 13 | 99% 13C  | nat abun | 1.71063 | 33436.6  |
| 13.16 | 13 | 99% 13C  | nat abun | 1.70735 | 23708.5  |
| 13.17 | 13 | 99% 13C  | nat abun | 1.70516 | 89965.6  |
| 13.18 | 13 | 99% 13C  | nat abun | 1.70078 | 64620.8  |
| 13.19 | 13 | 99% 13C  | nat abun | 1.69640 | 116417.8 |
| 13.2  | 13 | 99% 13C  | nat abun | 1.69640 | 216161.8 |
| 13.21 | 13 | 99% 13C  | nat abun | 1.69202 | 188690.3 |
| 13.22 | 13 | 99% 13C  | nat abun | 1.68326 | 98145.5  |
| 13.23 | 13 | 99% 13C  | nat abun | 1.67997 | 43639.0  |
| 14.1  | 14 | 99% 13C  | nat abun | 1.72978 | 3879.6   |
| 14.11 | 14 | 99% 13C  | nat abun | 1.72647 | 6395.8   |
| 14.15 | 14 | 99% 13C  | nat abun | 1.71323 | 11466.4  |
| 14.16 | 14 | 99% 13C  | nat abun | 1.70771 | 16896.9  |
| 14.17 | 14 | 99% 13C  | nat abun | 1.70661 | 17100.7  |
| 14.18 | 14 | 99% 13C  | nat abun | 1.70109 | 54519.2  |
| 14.19 | 14 | 99% 13C  | nat abun | 1.69889 | 68095.2  |
| 14.2  | 14 | 99% 13C  | nat abun | 1.69447 | 82815.7  |

|       |    |         |           |         |          |
|-------|----|---------|-----------|---------|----------|
| 14.21 | 14 | 99% 13C | nat abund | 1.69447 | 533396.7 |
| 14.22 | 14 | 99% 13C | nat abund | 1.69006 | 781146.9 |
| 14.23 | 14 | 99% 13C | nat abund | 1.68454 | 330091.1 |
| 14.24 | 14 | 99% 13C | nat abund | 1.68344 | 175264.4 |
| 14.25 | 14 | 99% 13C | nat abund | 1.68013 | 197046.9 |
| 14.26 | 14 | 99% 13C | nat abund | 1.67903 | 140984.1 |
| 15.08 | 15 | 99% 13C | nat abund | 1.72909 | 28284.9  |
| 15.09 | 15 | 99% 13C | nat abund | 1.72476 | 29998.7  |
| 15.11 | 15 | 99% 13C | nat abund | 1.71934 | 25057.6  |
| 15.13 | 15 | 99% 13C | nat abund | 1.71392 | 60574.8  |
| 15.14 | 15 | 99% 13C | nat abund | 1.71175 | 151498.5 |
| 15.15 | 15 | 99% 13C | nat abund | 1.70849 | 138528.8 |
| 15.16 | 15 | 99% 13C | nat abund | 1.70633 | 220243.4 |
| 15.17 | 15 | 99% 13C | nat abund | 1.70307 | 324151.5 |
| 15.18 | 15 | 99% 13C | nat abund | 1.69982 | 715222.5 |
| 15.19 | 15 | 99% 13C | nat abund | 1.69657 | 146343.4 |
| 15.2  | 15 | 99% 13C | nat abund | 1.69332 | 821646.7 |
| 15.21 | 15 | 99% 13C | nat abund | 1.69223 | 652432.3 |
| 15.24 | 15 | 99% 13C | nat abund | 1.68356 | 268143.0 |
